# Supplementary material for: A novel systematic byte substitution method to design strong bijective substitution box (S-box) using piece-wise-linear chaotic map
Source: PeerJ Comput Sci. 2022 May 11;8:e940. doi: 10.7717/peerj-cs.940 (PMC9138039; doi:10.7717/peerj-cs.940)
Supplement: Supplemental Information 5 [file peerj-cs-08-940-s005.xlsx]

## Sheet: Sheet1
		126	134	124	124	126	126	136	128	126	130	128	136	122	134	136	138	136	124	138	130	124	136	114	118	132	124	130	114	124	124	126	122	124	124	126	126	124	140	138	126	120	132	118	126	132	128	126	124
		132	142	126	124	128	134	126	144	116	126	134	124	120	126	134	132	124	122	134	128	136	114	118	140	116	130	134	120	136	130	118	120	140	118	134	120	132	130	130	128	132	118	126	120	124	130	130	136
		122	128	142	132	130	132	110	120	130	132	114	136	126	140	126	126	140	138	108	126	120	130	120	122	120	138	124	110	112	126	124	126	116	114	116	118	128	138	120	122	120	138	132	118	128	126	124	136
		136	126	118	122	142	124	128	144	132	114	126	126	134	132	132	132	132	126	134	130	126	136	140	124	120	122	118	118	134	128	144	130	126	132	128	132	132	138	138	134	126	124	124	124	112	134	130	122
		138	120	138	110	120	142	128	124	130	116	130	138	136	122	128	122	148	122	140	136	122	128	122	138	128	130	128	120	126	136	134	124	134	124	134	146	140	122	132	128	126	120	134	134	124	118	140	138
		120	128	140	118	122	126	126	116	136	136	128	118	118	138	150	124	128	128	120	126	142	130	142	120	120	128	132	110	138	110	118	138	134	134	134	124	116	144	132	130	138	122	134	120	124	128	128	118
		130	134	116	134	136	128	118	120	134	110	128	118	116	136	114	122	112	136	130	120	118	122	116	118	136	124	138	124	134	110	140	136	114	118	132	146	132	132	130	128	126	126	120	138	128	132	126	138
		124	124	128	134	118	130	130	114	138	126	126	152	124	124	128	134	126	142	134	124	128	140	136	120	124	136	124	126	134	126	126	132	116	124	124	142	114	134	130	114	118	122	126	116	132	116	124	134
		134	122	136	122	128	120	142	122	140	136	138	112	138	122	124	132	126	134	120	130	124	136	130	138	144	128	118	108	138	126	132	122	128	132	130	128	126	142	124	140	110	130	132	118	120	120	130	138
		124	138	130	134	142	116	136	126	134	120	132	124	112	138	130	114	142	120	128	120	120	122	134	128	120	126	138	126	122	120	120	128	136	142	122	134	130	120	120	122	118	128	136	120	120	130	126	122
		126	132	126	118	140	122	124	142	136	134	124	136	138	112	110	136	142	124	134	130	128	134	120	130	132	122	128	136	130	128	126	138	120	126	120	144	118	132	134	136	130	128	118	130	116	138	120	130
		132	138	126	140	120	122	126	126	130	132	128	134	114	120	116	122	138	132	132	138	138	120	128	136	136	134	126	108	108	134	134	126	146	136	116	142	130	140	128	124	136	130	126	128	124	146	118	128
		130	132	118	128	134	132	146	122	108	126	128	130	104	126	124	132	130	132	138	124	126	132	134	138	120	138	128	122	124	122	140	124	130	124	130	128	122	128	130	130	120	122	144	118	128	134	136	112
		128	140	120	132	132	128	124	118	118	126	138	118	126	110	130	122	138	134	122	138	130	134	130	136	136	136	124	124	124	124	128	122	130	118	130	126	134	122	134	120	120	120	124	136	144	136	132	136
		118	130	116	132	118	106	120	138	128	124	118	118	128	124	122	132	122	122	124	136	122	138	136	130	120	136	130	126	136	128	126	132	126	138	128	144	126	122	132	122	132	128	126	142	132	120	146	140
		124	110	142	132	128	126	134	108	124	114	126	136	128	146	142	116	120	134	134	116	136	130	138	136	128	106	134	128	128	134	130	120	128	118	130	108	132	118	122	120	132	134	110	124	128	126	134	136
		126	128	130	132	118	124	122	136	130	116	146	136	126	132	134	118	124	126	120	138	140	130	128	138	124	126	116	130	120	126	128	118	132	114	140	130	124	134	132	126	128	134	132	110	132	118	128	120
		116	128	116	132	120	132	136	124	124	116	132	136	136	128	128	128	128	116	116	128	128	132	132	132	144	136	132	108	136	144	124	136	136	136	120	128	152	128	136	136	132	112	124	120	124	128	116	136
		126	134	132	136	122	130	132	120	138	138	132	124	130	130	128	130	140	120	122	138	128	140	138	118	132	120	134	114	140	128	138	138	128	116	130	118	128	132	118	122	140	120	138	130	120	116	122	132
		120	136	116	130	110	122	130	120	120	124	128	126	130	122	138	132	132	124	128	118	106	134	118	132	140	128	124	114	126	126	118	122	114	126	106	132	120	120	136	130	130	138	142	120	116	120	128	134
		126	142	128	130	136	132	118	136	118	118	128	130	136	124	118	138	136	124	118	144	126	118	120	126	124	128	130	124	138	138	148	144	122	126	132	122	124	124	130	132	118	130	136	126	104	120	126	138
		132	126	122	114	138	124	124	124	128	134	122	122	122	128	128	132	132	130	114	142	114	144	132	128	128	130	122	142	122	116	120	130	134	116	112	128	136	126	126	134	122	132	120	128	128	138	138	130
		146	136	130	134	128	134	136	124	134	132	118	130	124	130	132	130	120	118	132	116	138	144	126	130	128	118	124	132	122	128	126	132	122	124	130	142	132	126	132	140	146	124	146	118	132	126	124	130
		124	134	134	114	138	116	128	130	134	120	136	132	116	134	130	122	130	136	132	136	132	122	122	116	132	130	142	130	134	132	132	144	124	122	130	126	134	132	120	122	134	124	124	136	128	134	114	130
		138	128	118	138	140	122	136	126	120	138	128	124	126	136	118	112	126	124	126	130	136	142	120	138	120	138	124	136	126	136	130	122	112	130	132	136	126	128	114	132	138	120	122	134	124	122	140	138
		128	112	136	134	122	126	130	134	134	118	126	116	128	132	128	134	118	134	118	136	132	136	124	124	124	124	124	134	122	126	122	132	140	128	120	130	118	118	130	122	122	134	134	136	124	132	144	134
		118	126	132	130	136	148	146	114	128	124	130	112	134	134	140	148	130	126	124	126	124	124	130	122	128	136	118	120	134	130	128	138	124	128	130	132	134	126	120	136	130	130	132	118	136	124	142	122
		120	120	124	132	116	124	136	114	126	118	142	138	134	126	134	122	118	126	126	142	138	130	114	124	124	140	128	140	132	124	136	146	134	122	130	130	134	122	130	136	136	132	136	108	132	136	132	120
		138	126	124	132	130	126	128	138	128	128	130	134	136	120	134	132	130	130	132	132	118	134	124	114	124	128	118	122	128	124	126	124	134	134	116	124	122	130	132	126	132	128	130	134	136	116	130	124
		144	118	126	128	128	138	122	130	126	116	128	134	114	132	136	122	130	116	132	130	130	128	128	140	128	130	118	144	124	130	118	126	130	148	136	118	122	128	124	132	124	134	134	136	128	134	126	136
		122	128	122	116	122	124	122	122	120	130	128	118	128	142	128	132	134	116	126	124	138	124	122	114	136	130	128	130	116	122	140	140	134	144	138	128	126	124	146	118	132	122	120	138	124	110	120	120
		122	138	128	128	122	114	120	118	136	144	118	130	132	124	146	130	132	148	130	142	144	136	134	136	130	122	120	136	130	106	136	120	134	126	120	132	138	130	132	126	132	116	126	126	124	132	134	122
		136	112	148	120	140	116	116	130	114	110	122	130	126	114	138	128	136	124	120	128	124	112	128	118	134	134	138	126	130	122	130	138	130	146	126	126	130	130	122	120	128	116	128	124	128	124	116	138
		138	128	122	116	126	128	130	134	136	126	128	134	128	122	140	122	144	122	120	122	128	118	140	128	142	136	126	116	122	120	126	132	138	120	142	128	150	128	126	106	120	142	140	130	120	146	128	130
		120	122	146	120	124	122	134	114	130	128	120	114	118	120	124	128	124	134	130	128	128	134	126	134	122	120	132	126	126	128	128	122	130	140	124	130	142	124	120	128	136	134	126	128	116	126	122	134
		138	136	134	130	128	134	136	118	116	130	116	128	138	128	126	146	124	134	124	132	114	124	134	128	126	136	130	138	132	126	116	142	136	118	132	132	130	120	122	128	126	140	126	134	128	134	116	124
		124	122	138	138	134	140	124	118	134	128	124	132	124	126	114	140	120	134	134	146	134	116	140	126	126	128	124	144	112	130	126	128	128	126	122	118	142	124	128	126	122	132	132	128	124	118	118	128
		134	130	120	118	144	144	130	130	124	128	114	120	134	126	124	118	128	124	118	132	130	138	128	136	134	138	128	134	120	136	138	122	120	124	138	128	122	122	124	128	130	118	128	134	116	132	130	128
		120	136	112	122	114	126	126	114	126	130	142	120	116	132	136	128	124	136	124	142	130	146	134	134	118	126	118	120	128	140	116	136	116	124	128	130	126	130	142	130	122	126	126	136	144	128	120	136
		134	138	140	138	132	140	122	128	114	138	128	118	116	136	130	128	114	126	132	126	124	124	118	136	118	126	120	122	124	128	118	124	122	126	128	126	136	120	126	120	138	122	136	118	124	128	122	120
		136	136	132	130	130	126	122	116	120	128	136	126	130	110	126	130	134	130	122	124	136	128	136	130	114	118	122	132	132	124	120	114	134	150	110	124	136	132	140	134	134	118	138	136	120	124	120	120
		122	120	122	130	136	126	124	124	130	124	122	130	132	142	120	120	130	132	134	126	140	118	124	132	122	128	126	134	128	118	120	124	142	124	126	122	120	126	140	140	130	124	146	134	120	114	132	132
		140	122	134	134	130	136	132	128	136	134	118	134	126	124	124	138	134	132	120	136	132	122	110	126	118	132	124	124	116	146	138	126	126	124	140	136	128	126	134	126	138	136	124	128	132	138	118	120
		126	128	138	120	118	132	134	124	122	136	130	116	146	140	126	128	122	112	134	128	130	124	130	116	110	136	142	132	134	132	122	122	132	118	116	138	132	130	136	126	112	118	124	126	128	130	112	122
		116	130	122	120	144	122	142	124	128	142	126	128	120	130	126	142	134	116	136	130	142	128	128	118	126	124	136	126	122	124	116	120	132	130	130	128	136	122	126	112	140	130	122	116	124	134	114	118
		142	130	128	136	142	122	128	140	122	130	136	132	130	130	136	132	114	134	140	124	138	126	132	136	134	118	132	112	134	118	124	138	132	128	130	126	136	116	134	126	128	128	114	138	132	132	142	130
		132	136	132	132	132	120	128	140	112	124	136	124	132	128	128	122	134	126	114	130	122	122	138	130	126	126	130	126	126	134	126	140	128	140	120	140	124	136	128	124	128	116	144	112	136	124	124	146
		142	120	134	132	114	128	134	130	124	122	132	122	124	134	128	118	140	122	120	138	128	130	136	128	130	124	134	144	122	112	122	132	130	128	126	116	122	132	130	130	140	134	128	134	112	126	128	134
		128	138	130	128	124	130	126	122	126	136	124	146	122	136	120	124	108	126	118	128	116	130	134	138	126	128	132	118	134	140	132	122	134	132	112	118	126	136	136	116	124	130	114	136	132	142	122	122
		122	130	112	132	126	134	132	130	128	124	118	138	120	124	134	118	124	116	126	138	128	136	130	120	114	134	140	120	114	126	116	136	122	134	124	132	134	114	120	142	132	132	118	134	124	132	134	134
		124	128	136	148	140	128	132	130	122	126	130	126	130	126	126	116	132	132	120	124	128	144	120	130	126	126	126	114	130	122	126	122	130	138	118	126	138	138	122	124	136	144	128	128	128	120	140	118
		138	122	124	122	128	124	114	110	120	124	134	112	134	134	132	130	132	124	134	144	126	122	120	136	122	126	128	126	124	132	138	138	128	116	130	136	122	138	140	120	126	126	132	110	128	140	134	108
		128	136	120	126	134	122	138	146	138	130	138	140	124	128	136	140	132	128	128	130	138	122	130	130	130	126	134	124	124	124	140	120	120	132	124	130	130	130	130	126	142	146	138	148	116	124	124	132
		138	136	118	122	128	126	120	122	140	126	132	116	122	124	118	126	116	118	136	116	134	144	126	128	126	140	134	118	120	142	124	134	132	126	128	128	130	132	138	144	118	132	110	130	116	122	128	112
		128	114	126	130	138	116	120	118	134	136	124	124	140	134	122	136	132	126	134	138	134	112	136	130	142	136	136	128	132	126	118	120	136	134	138	138	130	120	148	138	130	128	132	120	128	134	122	132
		142	132	122	134	128	126	128	120	126	132	130	122	140	130	140	124	126	112	138	138	128	122	136	132	126	128	130	118	132	134	124	124	110	120	122	114	136	130	136	116	118	144	130	142	132	118	124	128
		132	126	122	130	134	128	124	144	116	146	134	130	134	140	128	118	142	128	136	124	116	134	126	130	122	120	120	136	112	134	134	134	146	128	116	120	148	130	118	130	126	128	124	140	136	130	110	132
		126	126	128	122	124	128	126	124	122	138	132	122	116	128	110	116	122	138	124	118	136	124	114	112	118	134	128	142	120	116	138	132	118	138	136	130	136	128	122	128	106	118	132	130	120	128	130	140
		116	132	124	122	134	122	130	124	136	124	124	142	138	122	130	126	138	126	126	124	128	120	120	118	122	138	130	124	128	124	124	130	118	122	130	136	124	124	124	114	126	126	126	112	116	120	136	140
		130	134	128	128	130	126	120	136	142	114	120	128	142	138	120	136	134	138	136	116	138	126	116	136	138	126	120	140	126	130	140	130	140	140	134	130	124	116	126	126	132	148	130	110	140	116	122	126
		124	132	136	124	124	140	132	132	124	120	120	140	112	132	128	134	118	130	138	122	142	122	134	126	138	130	150	134	126	134	134	140	108	112	120	128	140	128	116	128	124	132	136	120	136	128	120	126
		134	132	134	140	138	116	102	112	114	128	126	132	126	136	118	124	130	116	150	140	130	136	146	124	126	144	110	132	134	124	114	130	128	130	132	130	128	134	112	126	128	122	128	134	120	134	132	126
		128	126	138	124	120	122	138	132	120	122	130	140	124	130	110	130	122	120	132	126	114	124	124	114	126	120	128	130	138	112	140	104	116	134	142	120	128	118	130	124	124	122	142	120	132	150	126	138
		132	114	134	124	124	122	122	142	130	140	128	134	126	120	128	116	140	134	134	136	132	126	130	122	130	136	120	122	126	116	128	124	124	130	130	128	132	114	118	126	126	120	120	118	146	132	128	124
		126	124	138	136	126	108	130	130	128	126	116	130	128	126	132	118	128	118	128	122	140	146	116	124	134	132	134	128	122	136	138	114	128	134	124	122	128	118	148	116	122	120	142	140	130	128	118	124
		140	132	116	136	120	124	136	114	134	114	130	142	134	126	138	132	136	136	144	124	140	152	116	126	138	126	134	122	130	114	126	116	124	132	128	120	132	136	128	130	130	110	122	122	126	118	126	136
		118	138	132	128	150	142	128	126	124	136	138	126	124	124	118	118	124	124	126	138	128	116	126	120	134	118	128	132	130	134	120	118	132	120	130	114	120	136	146	132	130	126	136	128	118	126	136	124
		132	144	132	138	126	130	134	122	114	122	122	132	124	132	132	120	120	132	116	118	126	138	146	122	142	134	130	144	124	124	128	126	130	118	122	128	116	128	132	120	128	136	120	130	138	130	130	134
		130	126	112	118	132	128	110	122	144	124	130	140	126	114	132	134	116	132	122	132	110	118	120	116	118	126	136	126	124	132	122	132	130	134	140	130	132	128	122	138	132	128	130	140	122	118	124	138
		128	134	130	134	126	128	124	114	126	136	128	136	116	130	130	124	124	126	130	134	118	124	136	142	122	144	128	128	132	134	134	134	134	132	128	120	136	122	142	120	132	134	126	122	110	124	132	134
		126	128	138	126	112	110	132	122	132	126	124	132	138	136	122	130	128	122	132	136	138	120	126	136	114	140	122	122	128	118	120	128	114	124	130	130	120	110	128	142	116	134	120	124	126	132	122	126
		116	118	138	134	122	128	140	136	128	114	122	130	138	128	128	110	130	112	132	132	136	138	134	142	118	140	132	136	128	138	122	124	120	146	134	134	138	128	132	116	108	134	134	130	130	136	136	122
		130	128	138	122	144	130	136	140	130	124	130	134	128	126	128	132	118	132	118	122	136	122	128	132	122	132	130	130	132	130	116	134	124	130	128	124	134	112	138	150	128	130	140	124	122	144	134	122
		128	128	140	126	142	126	122	128	124	116	132	130	134	126	134	126	130	130	138	132	120	136	128	126	126	126	122	136	128	128	132	128	128	128	116	126	126	126	114	128	116	132	132	122	134	118	126	130
		126	118	120	126	128	128	118	124	134	130	128	122	128	132	126	124	126	130	120	126	124	136	122	148	130	122	124	126	128	128	134	126	128	136	126	124	138	130	132	134	132	120	122	124	126	130	120	134
		124	116	136	136	128	124	116	128	124	132	144	136	120	124	116	138	134	126	138	126	118	138	122	138	134	118	138	118	134	122	122	126	126	134	134	130	126	122	142	122	130	138	138	126	122	126	122	116
		126	122	120	116	130	138	128	120	134	126	140	136	126	122	136	124	130	138	128	120	118	130	136	128	118	138	128	136	126	126	124	128	118	130	136	128	126	142	132	136	142	134	140	132	138	126	124	128
		124	130	138	120	128	126	130	132	120	118	118	132	132	130	110	126	126	136	132	130	126	120	128	130	138	116	120	118	122	140	108	130	122	112	124	130	142	132	116	122	130	120	132	122	134	116	132	128
		142	132	134	112	126	124	142	132	138	132	118	120	126	136	122	112	138	136	126	136	122	120	134	112	114	132	122	124	134	144	126	128	134	124	134	144	118	132	142	132	130	132	126	144	126	128	122	128
		128	116	128	132	120	120	128	134	106	126	134	134	126	126	130	108	120	124	116	132	124	140	120	130	130	126	130	118	130	122	146	140	124	124	120	136	132	120	120	122	126	142	134	130	130	134	114	128
		118	146	124	124	114	138	140	126	128	128	134	122	140	136	118	126	136	136	126	122	132	128	126	128	134	138	140	132	138	122	132	126	136	144	118	122	132	136	134	120	118	130	140	132	130	122	124	132
		132	122	126	124	124	114	130	138	114	136	144	138	134	140	120	132	120	130	126	124	132	126	126	134	126	128	112	130	134	120	132	116	120	130	134	124	124	134	118	150	126	128	136	138	134	120	132	140
		122	140	126	136	138	132	126	130	136	126	132	130	120	134	124	118	136	122	132	118	144	122	124	132	130	152	134	116	146	128	126	122	128	118	124	142	132	122	128	144	138	140	126	132	118	120	114	124
		132	142	126	142	130	120	144	126	130	132	132	132	128	134	118	124	124	114	134	122	114	124	128	130	130	136	124	112	128	114	110	126	134	132	136	116	124	118	130	136	128	134	122	134	134	128	132	110
		110	128	130	110	136	126	132	138	128	126	128	132	126	136	134	114	124	134	132	140	130	120	138	120	138	128	110	126	116	126	120	120	118	124	134	126	128	130	136	130	128	130	132	132	126	116	138	118
		116	136	132	118	130	126	114	134	138	118	138	132	128	124	136	120	124	112	108	126	130	134	130	134	138	126	130	140	128	108	128	110	118	126	142	144	136	128	128	120	128	136	128	122	130	130	122	118
		126	142	124	138	124	132	134	130	136	132	122	136	146	126	120	118	116	120	142	140	126	130	124	132	122	122	136	134	128	120	122	116	138	110	124	146	124	104	122	118	124	116	130	136	130	138	124	122
		124	124	140	134	114	106	122	140	136	124	116	126	130	126	126	126	122	138	130	128	124	132	124	138	118	138	138	120	124	120	128	136	144	116	136	122	122	142	122	144	128	128	132	150	134	134	122	114
		134	138	116	118	112	140	122	124	122	110	144	130	124	120	118	132	138	122	132	138	140	132	122	132	114	122	124	130	132	132	122	126	124	116	118	120	122	138	128	114	136	120	130	132	118	126	132	134
		132	146	134	122	126	120	132	124	112	130	134	130	118	132	144	142	134	128	136	124	116	138	122	138	130	144	120	148	140	134	134	124	132	126	126	126	134	124	116	124	140	138	130	138	122	132	132	114
		110	116	130	110	128	122	132	124	130	136	118	138	132	142	120	124	142	132	142	114	128	138	136	140	134	132	126	138	128	130	128	126	116	134	140	132	134	132	126	146	128	114	120	120	130	128	122	130
		120	110	114	124	136	110	134	136	116	134	126	132	132	126	122	118	118	120	132	122	142	120	136	126	130	128	112	122	130	144	132	130	130	124	128	130	118	144	120	122	134	132	116	130	130	120	124	120
		118	120	138	140	138	116	126	116	134	128	118	132	110	120	134	128	118	120	130	120	126	112	122	136	138	124	122	132	134	128	126	136	122	112	126	120	122	128	142	136	118	124	126	132	114	128	130	136
		124	136	132	104	136	128	136	116	132	140	132	132	128	140	136	122	130	118	118	138	134	126	106	118	130	130	126	118	142	122	138	126	122	138	126	134	126	130	122	130	138	134	126	130	126	134	138	116
		138	134	112	124	126	134	128	128	134	122	128	136	126	134	132	132	146	130	128	124	122	126	132	128	122	138	132	132	134	130	140	136	110	126	132	124	122	118	124	140	126	134	120	124	142	122	132	128
		118	124	134	116	126	132	130	108	122	116	126	144	122	124	114	138	116	110	116	122	128	138	124	134	136	134	124	126	132	138	132	124	138	128	130	140	126	116	138	124	130	132	118	140	126	136	134	138
		120	134	122	124	124	138	118	116	132	122	134	140	140	122	118	120	132	130	122	116	136	134	118	128	116	130	114	136	124	114	130	130	142	132	116	122	134	132	132	142	138	128	128	130	134	140	116	126
		114	134	136	144	126	134	124	128	130	122	124	120	134	138	128	126	136	124	134	130	112	136	126	134	144	120	146	138	136	124	130	120	122	134	120	144	118	142	124	140	126	126	144	132	122	126	124	134
		124	132	120	132	112	116	128	136	132	132	112	128	124	128	132	132	120	132	136	128	132	140	136	120	140	120	116	136	140	140	112	130	130	138	138	134	134	138	130	122	130	146	130	122	130	134	126	142
		134	122	124	122	128	132	118	112	130	138	136	134	136	144	126	138	124	128	142	124	134	130	136	138	120	112	138	120	126	126	128	138	132	128	118	128	130	118	116	130	136	128	130	116	130	130	124	132
		124	128	128	122	122	134	122	124	116	112	132	126	138	126	134	116	116	124	136	138	110	118	118	132	128	120	120	122	138	114	134	128	132	136	120	126	118	130	118	136	144	132	112	126	122	118	118	124
		134	136	142	118	132	130	120	128	122	128	130	146	140	142	136	138	128	126	124	136	126	144	134	122	132	118	128	116	134	140	134	134	120	130	132	116	142	116	134	134	124	122	136	136	126	120	126	124
		132	146	142	130	146	124	140	124	132	122	122	118	130	116	144	132	128	118	122	130	138	132	124	132	116	122	130	130	118	128	132	136	116	130	126	130	130	132	140	128	120	142	134	122	126	120	132	120
		126	124	118	114	120	122	132	126	128	142	132	136	114	124	130	116	122	116	118	146	144	126	128	138	132	118	132	136	122	120	134	140	126	124	130	110	120	138	128	138	120	134	128	124	130	124	134	136
		124	118	110	122	122	136	140	134	118	124	120	132	120	122	130	134	130	124	124	136	128	126	146	120	136	126	130	126	122	124	132	126	146	132	116	136	120	134	122	128	120	134	122	118	138	140	132	116
		134	118	124	138	136	128	126	118	136	120	122	120	122	138	124	128	130	130	124	142	136	128	146	126	124	132	122	124	138	130	136	132	126	150	120	130	108	116	134	130	128	128	134	120	142	118	116	120
		124	116	128	142	126	134	134	110	134	122	122	128	132	144	124	130	130	134	118	128	124	128	124	124	120	136	124	126	126	118	126	130	126	134	130	124	140	132	132	124	148	112	128	138	126	130	126	136
		126	130	124	124	134	134	132	126	140	144	122	118	120	136	126	108	130	126	120	144	114	130	128	122	144	116	126	138	132	124	130	122	112	132	126	110	120	112	134	124	138	110	128	116	142	134	108	130
		128	128	124	132	124	144	140	130	130	126	130	126	126	126	138	122	130	118	138	130	122	122	118	144	120	120	132	120	120	132	128	132	120	128	128	136	132	144	128	134	138	126	134	122	126	118	134	138
		138	144	114	124	130	128	110	138	124	130	116	138	120	134	132	116	138	140	122	120	122	124	134	118	132	126	140	126	136	130	124	130	132	122	124	122	136	118	116	128	130	128	122	124	106	112	134	126
		116	130	142	128	124	146	134	142	138	116	136	126	130	132	128	122	138	120	136	126	126	124	140	132	124	134	126	128	136	130	122	128	128	118	126	124	124	130	122	134	126	120	120	130	122	132	116	138
		130	134	136	116	114	130	120	124	138	126	124	112	138	130	116	130	120	124	130	134	128	128	130	118	136	132	118	130	120	120	118	136	134	134	132	136	130	126	128	116	142	142	136	124	130	134	132	122
		112	148	132	136	120	120	128	136	124	132	128	116	136	132	136	128	132	140	136	132	136	124	128	124	132	128	136	116	124	140	140	106	130	122	122	126	142	138	122	142	130	126	130	126	138	130	134	146
		146	116	114	132	122	116	134	128	126	120	122	124	118	128	126	126	120	142	108	122	128	126	120	134	124	130	132	130	140	130	120	116	122	128	114	128	146	120	134	140	126	116	138	112	118	116	126	118
		120	126	114	124	124	114	126	132	128	114	138	124	136	130	138	132	132	138	134	116	124	130	134	124	128	146	130	136	124	118	134	130	114	116	136	110	134	120	148	130	142	132	132	122	134	132	116	122
		126	120	126	118	132	130	128	124	130	116	138	118	132	138	128	126	128	142	128	144	122	132	134	138	132	130	132	128	122	132	126	118	124	130	128	120	134	136	134	126	124	122	136	140	122	148	122	120
		144	130	122	122	126	124	128	132	116	130	138	118	130	124	136	128	108	126	130	130	130	120	120	144	124	138	142	146	138	124	132	128	124	130	126	126	126	144	136	124	128	130	118	138	138	120	112	132
		138	138	128	118	120	128	110	124	142	126	124	134	144	120	126	134	120	112	126	120	122	130	128	122	132	132	138	128	122	122	128	138	116	128	118	136	106	142	124	130	132	120	134	132	126	138	128	120
		132	112	128	126	126	130	126	140	128	128	120	130	130	122	126	136	124	132	124	142	126	134	122	136	140	136	136	126	126	122	134	120	104	120	124	126	130	130	122	132	124	120	140	130	126	138	114	112
		118	122	128	122	136	116	146	114	136	136	126	124	130	130	136	140	114	126	124	118	116	120	126	142	132	124	138	128	118	126	124	132	130	138	128	134	140	140	122	106	128	124	122	140	130	126	140	132
		144	136	128	126	114	114	126	134	142	110	134	136	124	124	112	126	118	114	130	144	116	120	132	128	144	124	124	118	122	134	138	130	126	130	118	120	128	132	116	128	148	120	124	122	130	126	134	116
		130	144	134	118	128	130	120	146	116	134	132	120	146	128	142	120	126	144	138	118	116	138	132	130	136	126	128	120	118	120	122	124	118	128	134	142	120	126	140	130	132	130	136	140	126	144	126	124
		132	122	138	126	118	120	132	126	138	144	120	128	128	122	126	122	138	120	124	100	128	122	114	124	132	122	134	138	126	136	136	126	134	128	116	112	108	130	130	124	140	134	114	138	126	124	132	136
		130	140	126	136	142	128	134	134	124	138	120	138	132	122	124	128	122	128	122	116	130	120	134	150	132	126	116	118	120	114	124	138	120	126	132	130	124	114	132	128	138	124	134	132	138	124	130	138
		128	110	118	132	116	146	122	142	138	136	124	130	126	124	128	134	142	124	132	122	122	144	128	128	116	122	126	124	136	118	130	120	128	130	130	116	140	126	126	122	126	136	132	134	122	132	128	118
		122	134	124	124	138	130	116	122	136	128	122	138	132	120	134	136	126	130	124	112	122	130	136	130	124	124	122	126	132	136	138	138	128	120	114	122	132	136	126	108	126	114	136	136	134	134	144	134
		128	132	136	124	124	140	120	138	134	130	138	126	130	138	130	134	114	122	122	130	134	130	130	124	132	140	128	136	128	140	120	116	132	124	128	116	124	120	140	114	142	126	118	114	110	130	146	126
		130	130	124	130	112	132	138	122	120	144	126	124	134	122	132	140	114	130	136	130	116	136	122	126	128	128	122	132	130	142	116	138	124	140	134	124	122	118	108	128	126	134	132	122	116	128	122	134
		136	124	132	122	130	138	130	142	122	114	110	140	136	124	136	118	106	138	126	128	124	128	124	112	120	140	132	118	118	118	118	120	132	128	132	138	126	142	138	126	134	118	118	124	140	120	128	134
		126	140	142	130	132	130	128	118	136	126	148	136	134	116	126	112	110	144	130	126	128	146	128	118	136	122	112	132	114	124	118	126	124	130	132	124	134	124	130	128	130	136	126	126	116	130	116	130
		116	130	130	142	122	128	128	146	146	132	120	132	116	134	130	130	126	132	116	136	132	130	106	136	128	138	110	122	138	116	120	144	128	126	130	138	130	128	132	114	118	128	128	128	132	118	126	134
		134	128	134	132	130	128	126	122	136	130	128	130	128	126	124	128	130	128	130	132	126	136	130	122	132	122	132	138	132	118	128	132	118	128	130	136	154	136	122	134	128	138	132	134	120	118	136	128
		136	126	126	132	120	122	134	114	138	124	132	126	138	120	132	126	130	144	132	110	118	120	128	116	120	114	142	124	124	138	130	122	122	120	136	126	122	124	136	128	136	130	130	132	112	126	146	116
		142	134	136	140	138	122	132	130	144	120	130	122	120	120	122	128	134	134	136	140	130	130	140	114	120	128	138	146	136	128	130	120	130	122	136	128	138	130	136	122	116	132	122	126	136	104	118	120
		128	128	124	128	132	140	132	114	122	118	122	130	126	114	146	126	134	122	126	138	142	114	122	132	132	132	128	128	124	108	124	122	122	130	118	126	122	138	130	128	128	140	128	132	128	132	140	128
		130	130	132	132	134	126	120	132	126	114	132	128	130	134	120	142	128	128	114	118	128	120	138	138	132	120	122	122	132	120	114	130	120	128	126	130	120	128	134	118	124	128	118	126	124	136	126	140
		140	124	120	124	116	124	124	120	132	124	136	112	128	136	112	116	128	116	136	120	128	124	132	120	132	136	124	112	112	132	132	124	120	136	132	124	140	116	124	136	132	132	144	116	140	124	124	140
		130	124	146	136	138	120	126	132	118	116	138	108	126	120	126	146	128	118	144	118	140	134	136	126	124	134	128	130	120	126	144	130	128	122	116	138	128	126	128	126	132	114	132	126	124	134	128	132
		124	130	146	148	124	142	122	128	116	130	130	136	120	122	134	120	128	126	138	140	128	138	114	116	132	130	142	116	128	130	122	120	132	130	146	124	116	134	130	140	128	118	118	124	140	126	122	136
		126	128	110	130	116	134	128	128	122	120	114	118	132	114	120	138	120	126	132	140	134	132	126	130	140	126	112	128	118	128	134	116	122	124	138	122	124	142	128	128	122	128	130	122	112	118	124	126
		132	118	138	122	126	120	116	128	120	122	122	130	138	132	124	116	144	130	110	130	126	144	132	128	128	122	130	134	134	144	128	126	126	136	120	124	140	134	142	126	130	116	128	132	136	122	142	122
		122	134	124	118	132	116	142	132	114	122	124	142	136	132	130	122	128	156	126	128	130	138	136	142	120	128	142	128	126	130	132	132	142	122	136	130	128	120	138	116	122	130	132	126	128	116	130	130
		128	136	132	130	130	126	122	124	120	128	136	134	138	134	118	140	128	124	132	130	134	142	134	124	140	128	132	138	130	130	110	146	126	142	134	132	120	140	124	134	126	126	130	120	144	116	136	130
		126	128	138	126	120	122	120	114	120	118	136	136	130	120	134	124	118	132	138	138	128	110	120	118	136	114	128	124	130	132	126	118	120	134	116	132	130	120	138	128	122	124	130	134	132	134	136	126
		136	134	138	122	130	128	124	130	114	120	124	128	136	118	122	134	130	144	128	132	136	134	118	124	128	126	126	118	138	128	120	144	128	130	118	114	122	124	128	126	126	128	140	132	132	126	114	114
		126	118	124	138	124	120	130	126	116	128	134	128	138	130	124	136	142	126	116	122	116	120	130	126	124	128	118	136	122	122	116	122	108	120	130	128	126	126	132	120	130	130	124	142	132	128	134	122
		136	128	144	130	130	134	126	126	126	134	126	116	140	120	136	122	130	126	110	120	128	136	136	124	140	128	136	118	150	142	134	128	136	124	132	142	126	134	118	122	130	134	126	116	132	132	116	122
		118	130	124	140	130	134	120	118	120	144	126	118	136	120	126	124	126	130	128	116	118	122	128	122	136	120	138	142	124	124	134	136	126	126	136	132	130	138	132	122	124	128	126	138	132	112	126	116
		124	140	140	120	136	120	116	130	122	146	126	138	134	126	134	130	122	142	122	138	142	122	122	136	108	112	120	128	128	140	136	130	122	134	122	138	118	122	138	132	128	124	116	124	124	128	116	140
		122	132	118	144	130	128	122	126	132	130	128	138	128	130	144	132	134	132	126	128	122	116	134	130	128	130	136	130	128	126	116	116	126	140	126	128	130	124	118	142	132	118	132	126	116	130	112	116
		112	130	138	120	116	138	126	138	134	120	132	122	122	128	128	138	130	140	116	130	126	132	144	128	132	134	130	128	128	126	134	114	134	132	136	126	118	120	112	132	124	122	122	144	116	118	130	120
		122	132	122	128	130	136	118	136	126	128	130	128	142	132	142	126	120	126	140	126	136	122	136	126	132	122	132	118	124	134	128	130	132	138	144	134	128	138	136	126	132	130	140	130	128	122	124	136
		136	122	118	140	120	134	134	128	116	130	114	128	136	122	126	116	124	134	114	124	136	126	126	120	140	130	130	140	132	126	114	120	132	122	138	144	136	138	134	136	128	130	134	124	128	134	118	124
		110	130	128	128	118	122	136	144	122	126	128	128	122	134	128	146	124	112	122	122	132	136	122	130	120	116	130	138	136	124	122	146	128	120	126	122	136	128	142	134	136	136	138	126	136	128	114	136
		124	124	128	120	120	128	128	136	128	132	116	124	128	116	136	120	128	116	140	132	128	124	144	124	128	136	124	124	140	116	124	124	108	136	112	124	128	124	128	124	136	112	116	120	128	128	136	136
		138	126	132	130	128	144	122	128	130	142	132	126	124	116	118	118	120	132	130	116	146	130	140	118	128	140	122	120	118	118	136	132	122	122	116	130	132	128	134	124	146	138	140	126	136	140	130	142
		132	128	136	118	122	138	130	124	136	128	112	138	126	122	130	136	124	148	132	134	138	126	126	144	140	128	136	134	122	122	122	130	134	134	126	132	120	132	124	130	126	122	138	132	120	128	120	126
		130	136	130	130	120	134	124	124	134	124	126	122	120	134	132	118	124	126	116	116	134	120	130	146	144	122	136	132	126	136	122	124	130	132	122	142	136	122	108	136	126	120	126	134	128	122	140	114
		124	126	138	130	126	120	140	136	124	130	126	130	118	132	136	128	120	130	122	138	130	140	124	116	132	130	138	118	134	116	116	134	130	120	132	128	116	130	126	130	118	120	132	132	128	122	134	126
		120	132	128	134	130	130	130	120	132	128	144	122	138	122	142	118	122	134	134	124	132	132	136	134	126	146	134	128	124	132	124	142	130	134	126	120	136	128	132	130	122	126	122	136	124	116	124	124
		142	134	136	114	128	124	126	120	130	134	124	122	116	124	130	140	134	122	136	122	140	132	122	120	142	126	128	118	132	120	130	116	138	122	140	122	128	124	126	140	134	130	128	146	140	132	130	136
		128	118	126	126	138	136	132	124	120	118	130	118	118	108	132	134	142	120	136	124	144	130	134	122	142	120	140	132	124	126	126	118	122	128	124	140	124	114	130	134	118	140	108	128	132	122	118	128
		126	140	130	126	132	130	136	140	126	128	122	122	124	126	112	124	130	120	126	126	132	138	136	124	134	128	138	126	128	122	116	120	126	140	130	118	124	138	120	116	134	128	114	122	132	126	128	128
		124	130	130	128	116	134	126	128	124	138	130	136	116	134	110	134	134	136	140	130	122	128	124	134	118	136	132	122	138	136	132	124	120	126	126	144	132	126	134	124	120	134	126	136	132	126	134	142
		126	128	130	140	110	132	122	124	130	120	130	132	118	136	110	128	122	124	130	132	138	120	138	136	122	112	126	128	134	128	130	138	124	110	140	130	144	150	128	122	124	130	128	142	132	118	120	110
		128	128	128	128	128	136	112	136	128	144	120	120	128	128	128	138	138	122	130	134	134	134	118	138	130	122	138	134	126	126	118	116	124	124	132	124	140	132	124	124	140	132	116	124	132	124	140	118
		122	114	124	128	134	134	116	132	126	130	116	120	126	130	120	140	110	130	132	132	122	126	124	132	134	118	128	120	110	118	124	134	132	140	130	126	136	128	138	118	124	120	126	122	108	128	122	138
		128	136	124	132	124	124	128	130	122	134	130	122	130	134	122	136	136	136	124	132	116	124	136	138	146	134	130	130	114	126	122	126	126	118	114	138	122	138	126	128	128	132	128	120	128	124	120	122
		130	138	136	120	118	134	136	130	116	132	122	146	136	128	114	122	132	120	134	126	132	128	114	120	130	118	124	132	130	110	128	136	142	134	120	120	138	130	136	134	124	132	110	118	128	120	142	110
		148	130	134	128	124	118	130	138	142	136	132	134	114	120	140	128	128	130	138	112	128	126	134	130	130	128	112	134	118	128	128	130	134	124	120	134	130	140	128	124	120	106	134	124	128	134	122	130
		142	136	126	120	114	144	130	138	128	122	136	130	116	146	124	138	124	134	128	134	116	130	136	120	130	132	134	132	106	128	126	128	138	124	126	132	130	120	142	126	128	130	124	114	136	126	124	138
		132	126	126	122	130	132	128	118	118	124	128	120	140	130	130	128	132	130	122	126	126	124	120	118	134	128	108	124	136	138	106	116	132	126	130	126	114	140	124	142	130	128	128	136	128	134	130	132
		146	132	138	118	128	114	136	138	128	130	124	124	138	132	126	118	136	122	128	132	126	120	126	124	130	124	134	142	124	118	112	142	120	122	120	140	134	136	142	136	134	128	130	122	120	122	132	132
		132	132	136	134	126	130	122	122	130	118	110	120	140	140	128	124	140	124	124	118	130	126	138	150	122	126	114	120	128	120	144	120	120	120	128	122	134	138	126	126	122	126	114	120	120	136	112	128
		138	142	144	134	120	128	138	126	132	112	118	128	118	126	132	130	120	128	134	128	126	130	144	124	126	118	128	126	112	124	134	142	120	140	126	128	130	130	124	140	130	126	116	138	128	144	134	132
		132	130	126	122	130	128	120	128	132	126	130	142	126	120	128	118	134	120	112	116	120	138	126	126	126	124	124	120	132	130	118	134	138	116	144	132	132	126	126	134	106	120	124	112	120	134	118	128
		126	128	126	138	120	138	128	124	122	116	114	134	124	150	148	124	134	128	130	126	128	122	124	132	126	136	106	134	128	122	132	136	130	128	130	134	112	134	128	128	130	128	122	134	128	134	128	128
		120	144	132	134	138	126	126	132	124	128	132	126	130	130	114	126	126	134	122	128	124	128	128	130	114	134	122	128	124	140	124	110	126	138	134	124	136	136	128	130	130	138	118	116	128	140	132	132
		138	122	120	130	132	120	126	136	146	122	144	138	140	136	134	132	118	146	120	150	136	120	142	128	130	126	140	130	132	132	130	116	138	126	128	118	124	132	118	128	126	122	124	130	128	128	130	128
		116	124	120	128	132	124	128	124	132	120	120	116	140	120	128	130	130	130	130	130	130	122	130	118	122	102	122	126	130	126	122	124	148	120	136	128	136	116	124	132	128	136	140	120	148	124	136	142
		122	134	128	104	126	130	144	124	122	126	116	120	114	118	128	132	130	130	128	128	114	130	140	140	126	126	136	132	122	130	136	126	128	120	146	114	120	136	126	146	128	120	134	130	132	124	118	130
		124	118	134	116	136	150	126	132	116	138	118	136	136	122	118	110	130	128	136	130	126	136	136	138	130	124	128	126	150	116	136	140	132	138	134	120	128	122	134	132	128	146	138	128	132	130	130	126
		122	124	130	136	134	124	134	124	138	132	126	128	138	128	118	120	114	124	138	132	122	128	138	128	126	136	138	128	130	128	134	138	140	122	128	122	128	138	132	126	140	114	132	122	132	142	140	126
		136	122	130	136	144	126	150	126	130	116	128	138	126	124	120	128	128	126	118	132	124	134	134	126	138	128	108	126	130	132	136	122	134	116	120	130	118	128	140	132	148	130	130	128	136	114	122	138
		126	136	134	112	130	120	122	130	124	122	116	130	128	138	136	130	128	130	128	122	140	138	124	136	114	120	130	128	110	128	126	112	118	124	130	128	106	132	126	114	132	142	128	114	120	118	124	130
		136	136	124	136	128	136	132	126	130	130	114	146	126	134	134	120	116	132	124	132	120	128	136	134	126	118	122	134	126	126	138	110	138	126	126	130	126	130	122	144	128	140	128	120	112	124	128	138
		134	130	116	124	134	130	144	138	124	124	130	126	140	124	134	130	116	116	138	126	132	116	134	128	126	130	124	132	142	130	128	112	118	134	120	128	130	130	120	122	124	120	126	122	128	124	126	126
		136	132	132	114	126	126	114	126	142	122	114	112	108	132	136	116	124	120	136	126	130	138	134	138	122	126	118	116	136	128	124	128	136	136	128	138	134	130	142	134	126	126	134	128	132	120	124	136
		122	118	120	122	140	132	126	126	128	128	130	132	134	138	124	130	124	124	118	128	130	134	120	124	126	146	124	126	128	128	138	126	132	132	114	136	126	138	136	136	118	138	120	126	116	124	130	124
		124	110	134	130	114	124	128	122	126	144	136	124	132	134	138	128	136	126	138	122	126	132	132	122	122	136	132	132	112	134	118	124	136	126	142	130	122	136	124	126	122	136	128	124	116	130	126	148
		134	124	126	118	132	114	132	114	128	122	116	132	138	116	126	142	128	118	116	136	130	136	134	148	126	136	142	130	116	134	124	126	120	130	136	120	122	116	122	132	150	124	122	130	140	122	120	132
		134	124	122	134	132	134	124	124	110	128	130	142	128	118	136	132	114	124	130	126	124	130	136	120	130	128	138	126	128	130	132	126	136	134	136	116	126	136	138	130	120	138	128	116	114	136	118	126
		112	122	114	118	138	136	132	132	136	114	126	122	138	128	136	118	126	120	128	116	144	126	122	118	130	124	120	124	116	138	130	136	128	114	122	118	130	128	108	120	124	134	122	134	134	132	116	130
		126	106	148	134	124	144	138	132	126	126	148	126	128	128	134	132	134	130	120	126	128	132	130	128	126	118	120	142	124	132	142	130	132	120	134	148	126	130	128	126	140	116	126	124	114	130	140	126
		128	116	128	122	126	122	130	132	120	116	124	118	126	122	126	126	114	122	122	112	136	136	132	126	134	134	130	128	140	140	116	128	144	108	112	118	130	134	126	136	132	136	144	126	118	138	118	134
		138	122	116	140	146	126	132	136	130	126	120	116	138	130	120	120	130	138	140	124	122	134	124	136	130	126	128	132	130	130	120	136	114	122	132	124	114	126	132	124	118	130	124	128	118	134	124	120
		128	140	124	124	116	124	132	132	124	136	120	116	132	124	116	126	134	126	118	134	134	146	130	126	126	134	126	122	114	126	126	138	134	122	126	110	122	122	126	126	122	118	130	118	114	122	134	128
		134	116	134	132	134	132	122	140	130	132	126	128	122	140	130	148	118	120	118	136	142	136	130	128	130	128	134	124	122	112	122	124	130	128	114	132	126	124	122	140	130	132	126	140	126	128	126	132
		116	130	130	136	116	138	122	144	124	130	122	124	136	134	134	138	114	128	124	118	134	116	144	126	142	132	120	126	126	132	144	138	114	144	140	126	126	124	136	138	130	120	116	122	114	136	140	128
		138	124	126	124	130	140	130	126	120	130	108	134	124	134	132	138	136	126	124	130	124	122	140	128	110	124	130	116	126	124	118	130	124	118	128	130	128	130	136	124	126	128	138	128	134	120	126	124
		144	130	130	124	124	126	118	126	118	124	132	122	130	128	128	120	116	142	122	124	144	138	134	130	134	140	128	126	138	120	140	128	124	134	146	136	132	118	122	118	138	136	124	134	122	120	132	136
		126	130	132	136	122	114	120	130	112	132	118	134	128	128	142	130	128	124	126	118	136	120	126	116	130	126	128	132	126	134	132	138	128	124	126	122	132	140	130	144	126	114	124	124	134	126	132	120
		124	132	124	124	128	124	124	122	126	130	122	150	122	138	130	128	132	128	120	116	136	120	144	110	122	122	130	122	126	138	122	116	124	140	128	136	128	132	136	134	134	138	142	138	130	130	126	120
		142	122	128	134	124	120	142	134	128	132	134	132	126	146	124	126	128	132	126	132	142	122	132	116	130	126	132	122	120	140	138	124	126	138	124	134	128	132	118	130	120	140	130	124	114	126	124	126
		128	124	124	142	122	134	122	130	118	134	130	140	132	116	124	128	132	116	112	122	130	122	146	134	126	122	130	140	128	132	128	122	130	126	134	140	120	132	136	120	132	132	136	142	134	118	126	134
		134	124	126	130	136	130	132	126	128	134	108	112	130	124	146	114	120	138	132	140	114	128	122	128	130	132	130	130	132	130	128	132	134	132	122	126	136	122	136	130	136	142	128	124	122	132	126	134
		128	138	126	142	114	104	128	130	118	124	116	132	140	126	138	124	140	118	138	126	138	120	120	130	134	132	124	136	120	138	126	134	126	128	140	116	128	118	118	124	136	126	142	126	110	136	124	130
		138	126	124	118	128	124	130	128	130	134	140	130	116	120	134	120	130	126	132	126	128	116	122	144	130	126	124	130	140	136	118	130	140	132	130	136	122	138	120	134	120	128	134	128	138	146	136	130
		128	128	140	130	126	126	126	140	148	120	132	134	138	118	134	146	130	126	122	128	124	136	120	130	138	146	126	128	116	132	116	128	132	136	128	106	138	134	130	140	112	136	120	134	134	126	130	138
		126	120	126	122	120	126	132	136	118	128	126	118	124	122	128	128	122	144	130	122	124	126	120	136	130	120	130	118	128	122	132	126	124	122	128	132	130	132	122	130	128	134	116	124	130	132	122	122
		124	126	122	130	122	120	128	132	128	118	146	118	118	128	128	130	138	132	116	128	132	122	134	130	122	112	128	120	116	142	114	136	112	134	118	134	130	116	136	140	124	142	118	138	134	140	128	126
		130	128	126	128	126	124	110	128	134	140	134	120	130	152	126	136	122	124	122	124	130	124	134	120	126	136	130	140	142	128	126	116	130	108	118	124	118	120	134	132	134	120	126	124	130	140	126	136
		148	134	126	148	128	130	138	120	144	142	122	128	136	134	138	126	138	124	116	130	134	128	120	130	130	120	132	122	122	136	140	130	126	124	132	126	122	120	136	134	110	120	124	126	142	136	140	132
		130	118	128	124	122	138	128	132	130	126	132	120	130	122	140	124	122	118	116	116	118	134	120	128	106	126	136	120	118	126	124	120	134	126	132	136	122	110	120	124	134	110	144	132	130	118	124	116
		140	128	140	124	128	120	140	124	116	132	132	140	124	144	136	130	130	114	130	134	110	122	114	122	150	138	126	130	118	134	130	122	134	126	130	130	134	122	134	122	122	118	134	134	126	118	126	140
		114	122	136	124	122	126	120	134	124	128	114	118	112	136	126	118	140	124	126	138	124	120	134	132	142	130	136	124	138	130	124	130	128	116	118	122	124	124	130	136	130	138	136	132	122	118	144	132
		132	116	116	120	140	128	112	130	122	130	126	138	122	142	130	124	124	128	132	128	136	144	124	130	134	146	146	126	114	138	122	132	128	124	132	128	124	132	124	122	138	118	138	134	126	126	138	116
		130	132	126	124	130	116	106	130	128	126	124	130	116	122	132	126	128	118	120	130	120	126	124	136	134	128	134	144	130	132	134	130	136	118	140	126	136	126	128	132	126	136	138	108	138	132	146	128
		124	130	134	116	120	126	130	126	118	132	132	130	130	120	120	132	136	134	114	132	136	118	122	134	134	124	132	126	126	140	108	120	124	126	138	140	144	130	134	130	146	124	116	126	126	128	128	124
		122	132	138	114	124	130	136	138	140	138	128	132	134	128	134	134	124	122	132	132	122	124	134	136	134	128	122	134	116	130	140	124	134	124	106	138	132	126	140	130	124	126	132	120	130	120	126	122
		120	122	142	126	138	120	128	122	138	124	136	124	128	126	126	120	124	134	134	118	118	132	128	134	130	140	132	120	128	126	130	118	130	112	120	128	120	130	134	128	132	138	122	126	126	128	124	134
		134	106	128	130	112	124	130	122	128	136	126	140	130	114	128	122	136	140	138	128	134	122	136	132	130	130	128	130	128	128	118	132	114	122	112	134	132	132	130	130	136	132	130	124	122	126	140	122
		140	132	144	122	114	138	122	122	118	126	130	128	128	136	136	132	136	124	120	118	142	122	130	122	126	130	118	136	136	116	124	122	122	118	118	124	136	124	128	132	116	128	120	138	126	130	118	130
		132	126	126	138	134	132	124	130	122	136	124	124	132	134	138	146	126	132	124	132	128	138	130	116	132	134	114	126	134	140	128	130	126	120	128	136	140	130	114	140	140	130	126	122	138	124	136	112
		134	132	126	126	128	122	128	110	112	134	132	128	118	120	122	136	142	132	118	130	132	134	132	130	132	130	136	128	118	128	138	124	134	140	130	134	116	134	128	126	124	130	116	116	126	128	126	128
		112	132	124	138	130	126	134	130	134	126	130	132	128	128	132	126	130	126	130	144	132	136	116	120	128	136	136	138	130	130	138	122	122	126	118	132	132	144	128	124	144	136	140	126	130	146	126	136
		114	126	128	130	128	116	122	126	124	128	126	124	118	130	148	132	130	122	136	146	108	124	126	118	128	128	106	128	118	126	140	128	134	122	136	138	140	128	130	130	140	136	122	136	126	122	112	124
		144	124	120	120	124	132	132	126	134	134	146	130	142	130	130	130	130	134	122	118	130	122	122	128	136	136	124	128	132	112	128	136	132	120	128	132	140	124	128	122	126	126	118	122	122	126	130	138
		126	142	128	132	122	134	128	134	132	124	126	122	128	124	118	124	122	118	120	128	134	134	128	126	124	112	130	122	128	128	138	122	120	120	146	122	128	132	134	128	134	118	136	136	134	130	140	126
		128	142	126	128	132	122	134	114	138	124	132	126	130	132	112	130	126	128	124	118	126	112	128	132	136	134	122	132	124	114	130	128	132	130	134	120	128	142	126	134	114	132	144	122	130	124	140	118
		126	132	122	128	134	124	114	122	120	134	132	122	136	126	132	132	126	116	126	124	126	124	134	138	132	130	132	122	116	114	140	118	148	114	128	126	124	122	128	136	126	132	130	128	142	108	122	142
		120	138	134	124	128	130	130	132	124	118	130	128	132	126	126	112	132	138	138	132	132	122	126	140	128	142	126	136	120	134	122	142	138	124	116	130	122	116	128	126	146	124	124	130	130	116	136	126
		126	136	122	120	126	128	146	120	126	140	126	132	146	136	138	130	124	126	124	142	136	130	136	142	128	126	140	126	144	118	124	132	122	124	134	132	138	132	134	124	122	128	122	128	126	140	126	142
		136	128	128	120	116	128	116	128	136	136	128	120	124	128	132	124	108	124	132	124	128	132	128	132	132	124	124	124	136	132	128	122	118	126	122	134	126	122	130	118	122	146	126	122	130	110	126	122
		126	130	136	120	134	126	116	116	122	114	112	128	126	122	128	134	124	132	138	130	128	124	122	126	124	144	126	126	140	132	130	116	130	126	132	136	134	126	116	128	118	126	124	128	142	130	136	126
		140	128	136	126	138	126	142	124	132	128	140	126	126	130	126	128	120	124	128	138	130	142	122	124	128	124	132	138	134	130	122	132	128	116	132	138	126	130	114	136	136	132	128	130	114	118	122	144
		126	130	124	138	132	136	118	132	118	126	140	118	124	124	134	134	136	136	126	136	142	118	120	134	124	136	130	120	122	118	116	122	132	128	134	132	122	126	120	122	120	120	130	124	126	126	132	140
		128	130	122	122	130	112	128	132	128	122	142	122	126	140	136	128	120	126	118	126	126	136	120	124	112	110	130	134	130	124	120	128	128	138	122	126	118	132	108	116	120	130	134	118	130	136	132	128
		130	120	130	122	128	122	136	124	130	124	114	134	144	134	112	134	120	118	128	128	126	120	126	134	108	134	140	120	122	120	122	114	136	126	124	128	130	140	118	122	132	134	128	128	134	116	122	128
		128	120	128	122	122	114	130	126	126	134	134	136	120	128	120	134	126	142	134	124	124	124	132	132	140	124	124	114	146	130	130	122	126	122	134	128	116	120	124	116	136	132	136	122	126	130	126	120
		126	130	120	138	124	136	122	126	140	116	122	132	134	134	136	132	130	130	120	134	136	128	114	134	148	128	134	132	134	138	124	120	134	134	116	126	120	112	130	118	124	128	134	136	138	134	128	124
		128	122	126	134	118	124	128	142	118	136	132	124	124	122	126	138	126	132	124	124	120	122	138	120	116	146	146	122	134	112	144	122	134	132	116	128	132	126	134	132	136	134	126	122	126	120	144	136
		142	128	130	130	116	130	120	134	140	122	124	124	126	120	134	120	130	124	130	130	112	118	128	130	116	130	136	144	142	136	122	124	122	136	130	118	136	138	136	122	136	138	108	112	138	128	126	136
		136	130	114	124	120	130	126	126	130	132	112	126	126	136	136	130	114	120	128	126	138	120	116	120	132	130	118	136	136	134	134	120	136	134	126	136	132	130	126	118	114	120	140	138	122	120	120	126
		130	120	130	124	118	140	118	130	128	130	128	126	140	134	124	124	134	132	142	132	134	124	118	138	128	114	144	122	128	130	136	134	132	134	116	126	116	126	124	140	126	140	134	132	134	132	134	134
		116	144	112	128	120	120	124	114	122	118	114	118	130	122	122	122	130	142	122	130	134	126	134	108	120	116	140	136	128	128	132	128	132	124	124	136	128	116	120	138	130	130	126	126	122	142	126	138
		126	130	124	124	130	130	116	126	128	120	134	138	132	144	134	124	126	118	148	124	118	146	136	126	132	120	138	134	116	132	126	122	132	124	122	142	120	124	138	140	114	134	128	120	126	134	144	126
		136	112	128	140	128	124	120	124	120	132	128	128	144	128	128	116	128	120	124	140	132	128	128	120	136	124	140	112	116	124	128	130	122	110	134	126	130	130	134	134	122	138	118	130	122	134	134	130
		122	130	140	132	118	138	124	124	138	146	144	132	130	118	132	110	124	128	118	130	128	112	134	134	136	140	134	126	120	136	122	140	122	134	132	128	110	118	116	124	126	130	132	124	134	118	112	118
		124	122	114	132	148	130	118	128	136	130	134	140	120	130	130	128	140	118	134	128	128	138	134	128	136	118	130	128	140	122	114	134	130	124	124	134	126	136	124	118	134	124	128	126	122	128	120	142
		142	136	138	120	134	128	122	120	130	132	122	132	142	128	126	130	128	122	124	138	128	122	140	126	120	138	128	122	124	126	132	124	118	132	130	120	130	136	110	120	126	148	150	136	126	140	134	142
		120	122	130	122	138	136	120	128	128	142	126	126	118	120	128	128	116	138	134	122	134	128	116	120	132	142	130	134	122	144	124	120	108	130	110	114	134	136	132	132	120	130	142	122	142	124	136	136
		118	128	126	122	132	122	124	124	122	140	138	134	136	126	128	118	112	114	116	132	122	128	142	126	128	122	124	132	114	120	134	122	120	126	116	140	142	120	114	142	116	122	128	136	130	116	126	120
		136	128	132	130	138	130	126	128	120	116	128	126	126	162	126	128	128	136	116	122	122	122	110	136	136	124	144	126	118	122	126	132	120	140	132	130	134	146	130	128	140	132	124	122	142	134	126	128
		118	130	140	142	128	116	114	132	138	134	128	138	132	112	134	134	124	116	118	128	122	130	128	134	108	132	134	128	130	130	136	122	128	128	138	132	126	134	124	142	132	132	126	112	130	130	128	124
[truncated: 207 more columns]
